1 **Variation in the microbiome of the urogenital tract of female**  
2 **koalas (*Phascolarctos cinereus*) with and without ‘wet bottom’**

3 **Alistair R. Legione<sup>1, #</sup>, Jemima Amery-Gale<sup>1</sup>, Michael Lynch<sup>2</sup>, Leesa Haynes<sup>3</sup>, James R.**  
4 **Gilkerson<sup>4</sup>, Fiona M. Sansom<sup>1, \*</sup> and Joanne M. Devlin<sup>1, \*</sup>**

5 <sup>1</sup>Asia Pacific Centre for Animal Health, The University of Melbourne, Parkville, Victoria  
6 3052, Australia

7 <sup>2</sup>Veterinary Department, Melbourne Zoo, Parkville, Victoria 3052, Australia

8 <sup>3</sup>Faculty of Veterinary and Agricultural Sciences, The University of Melbourne, Werribee  
9 3030, Victoria, Australia

10 <sup>4</sup>Centre for Equine Infectious Diseases, The University of Melbourne, Parkville, Victoria  
11 3052, Australia

12 #Corresponding author (email: [legionea@unimelb.edu.au](mailto:legionea@unimelb.edu.au))

13 \*These authors contributed equally

14

15

16

17 **Running title:** The urogenital microbiome of the female koala

18

19 **Word Counts**

20 Abstract: 235

21 Importance: 128

22 Main text: 4153

## 23 **Abstract**

24 Koalas (*Phascolarctos cinereus*) are iconic Australian marsupials currently threatened by  
25 several processes. Infectious reproductive tract disease, caused by *Chlamydia pecorum*, and  
26 koala retrovirus infection are considered key drivers of population decline. The clinical sign  
27 of ‘wet bottom’, a staining of the rump associated with urinary incontinence, is often caused  
28 by chlamydial urogenital tract infections. However, wet bottom has been recorded in koalas  
29 free of *C. pecorum*, suggesting other causative agents in those individuals. Current  
30 understanding of the bacterial community of the koala urogenital tract is limited. We used  
31 16S rRNA diversity profiling to investigate the microbiome of the urogenital tract of ten  
32 female koalas. This was to produce baseline data on the female koala urogenital tract  
33 microbiome, and to undertake preliminary investigations of potential causative agents of wet  
34 bottom, other than *C. pecorum*. Five urogenital samples were processed from koalas  
35 presenting with wet bottom and five were clinically normal. We detected thirteen phyla  
36 across the ten samples, with *Firmicutes* occurring at the highest relative abundance (77.6%).  
37 The order *Lactobacillales*, within the *Firmicutes*, comprised 70.3% of the reads from all  
38 samples. After normalising reads using DESeq2 and testing for significant differences ( $P <$   
39 0.05), there were 25 operational taxonomic units (OTUs) more commonly found in one group  
40 over the other. The families *Aerococcaceae* and *Tissierellaceae* both had four significantly  
41 differentially abundant OTUs. These four *Tissierellaceae* OTUs were all significantly more  
42 abundant in koalas with wet bottom.

### 43 **Importance:**

44 This study provides an essential foundation for future investigations of both the normal  
45 microflora of the koala urogenital tract, and better understanding of the causes of koala  
46 urogenital tract disease. Koalas in the states of Queensland and New South Wales are  
47 currently undergoing decline, and have been classified as vulnerable populations. Urogenital

48 tract disease is a leading cause of hospital admissions in these states, yet previously little was  
49 known of the normal flora of this site. Wet bottom is a clinical sign of urogenital tract  
50 disease, which is often assumed to be caused by *C. pecorum* and treated accordingly. Our  
51 research highlights that other organisms may be causing wet bottom, and these potential  
52 aetiological agents need to be further investigated to fully address the problems this species  
53 faces.

54

## 55 **Introduction**

56 The koala (*Phascolarctos cinereus*) is an iconic marsupial species endemic to Australia.  
57 Northern koala populations, in the states of Queensland and New South Wales, are currently  
58 declining due to impacts from disease and increased urbanisation. A significant pathogen of  
59 koalas, *Chlamydia pecorum*, has been a main focus of koala infectious disease investigations  
60 since its discovery. *C. pecorum* infection of the conjunctiva or urogenital tract can lead to  
61 blindness and infertility in koalas, respectively, greatly impacting population fecundity and  
62 survivability (1, 2). *C. pecorum* is commonly associated with the clinical sign known as ‘wet  
63 bottom’ or ‘dirty tail’ (3). This staining or scalding of the rump is associated with cystitis due  
64 to *C. pecorum* infection in some populations (4), but recently samples from a large number of  
65 koalas from Victorian populations with mild wet bottom were negative via qPCR for *C.*  
66 *pecorum* (5). In particular, koalas in a population considered at the time to be free of *C.*  
67 *pecorum* (6) had a similar prevalence and severity of wet bottom to populations where *C.*  
68 *pecorum* occurred in more than 35% of koalas tested. Further analysis demonstrated that  
69 whilst wet bottom could be significantly linked to the detection of *C. pecorum* infection in  
70 male Victorian koalas, this relationship did not exist in females (7). It may be that an  
71 unidentified organism is causing these mild clinical signs of disease in koalas. To date there

72 has not been extensive research to determine the normal flora of the koala urogenital tract,  
73 making it difficult to use traditional microbiological techniques to determine species of  
74 interest. Modern sequencing technology, specifically 16S rRNA biodiversity profiling, was  
75 used to improve our understanding of the microbiome of the urogenital tract of koalas, and to  
76 undertake preliminary comparisons of the microbiome of female koalas with and without  
77 mild wet bottom.

## 78 **Results**

### 79 **Clinical status of koalas**

80 Urogenital samples previously collected from ten koalas as a component of population health  
81 monitoring were selected from an archive of samples available at our institute (7, 8). The  
82 criteria for selection was based on adequate cold storage of samples in an appropriate buffer.  
83 Five samples that met our criteria, taken from koalas with wet bottom, were available. An  
84 additional five samples, taken from koalas with no clinical signs of disease, were selected  
85 from the same population. Of the five koalas with wet bottom, the median wet bottom clinical  
86 score was 3 (ranging from 2 – 4). The five clinically healthy animals all had wet bottom  
87 clinical scores of 0. All koalas were negative for *Chlamydiaceae* using a pan-*Chlamydiaceae*  
88 qPCR.

### 89 **Analysis and processing of sequencing data**

90 A total of 2,295,607 paired reads were obtained across the ten samples, ranging between  
91 189,315 to 312,131 reads per sample. The GC content of the reads was 51.8%. Merging  
92 paired reads, trimming 5' and 3' ends, quality filtering to remove errors and discarding  
93 merged sequences shorter than 400 bp resulted in a total of 1,347,512 reads. Dereplication  
94 resulted in 275,642 unique reads for clustering into operational taxonomic units (OTUs).  
95 Through the clustering process, it was determined that 3953 unique reads were chimeric,

96 representing 24,376 filtered reads. The non-chimeric unique reads were clustered into 261  
97 OTUs, 7 of which were either chloroplasts or mitochondria and were subsequently removed  
98 from the analysis. In total 1,946,587 reads, from 2,221,529 merged reads (87.6%) were  
99 matched to the clustered OTUs. Within samples, this ranged from 162,343 (82% of available  
100 reads) to 254,327 (92.1% of available reads) (Table 1). For comparison, the same filtering  
101 and clustering methodology was run without the removal of singletons, which resulted in the  
102 clustering of reads into 592 OTUs.

### 103 **Phylum presence and relative abundance**

104 In total, 13 phyla were detected in the ten samples (Table 1), with Firmicutes occurring at the  
105 highest relative abundance (77.61%). Just over a third of the OTUs were classified as  
106 Firmicutes (95/254), followed by Proteobacteria (59/254) and the Bacteroidetes (35/254).  
107 When samples were split into the two groups, koalas without wet bottom had 89.3% of reads  
108 classified as Firmicutes, followed by OTUs which could not be assigned using the 90%  
109 similarity threshold (5.2%) and Actinobacteria (3.5%). Koalas with wet bottom had 68.2%  
110 reads assigned to OTUs classified as Firmicutes. The next two most prevalent phyla were  
111 Proteobacteria (12.5%) and Bacteroidetes (12.2%), however these phyla were over-  
112 represented in two samples, biasing the total relative values. Deferribacteres were detected in  
113 only one sample (Koala 70, wet bottom present) and Acidobacteria were only detected in two  
114 (one clinically normal koala and one displaying wet bottom). Armatimonadetes was detected  
115 in three koalas without wet bottom, but in none of the five diseased koalas. These three phyla  
116 were detected at the lowest relative abundance across the ten samples. Data for relative read  
117 abundance for OTUs that could be taxonomically assigned to a genus level and occurred at a  
118 percentage of 0.01% or more in either group can be found in Table 2. This shows that the  
119 order *Lactobacillales*, and within that the genus *Aerococcus*, had the highest proportion of  
120 relative reads.

121 **Richness and diversity**

122 Species richness within each sample is described in Table 1. The mean species richness and  
123 Chao1 from 100 iterations of subsampling every 5000 reads is shown in Figure 1. After 100  
124 iterations of rarefaction to a depth of 160,000 reads per sample, the mean number of OTUs in  
125 the two groups was 80.0 (S.D.  $\pm$  9.62) and 75.93 (S.D.  $\pm$  24.61) for koalas with wet bottom  
126 and without wet bottom, respectively. All alpha diversity metrics compared between samples  
127 from koalas with or without wet bottom were not significantly different. This included  
128 observed OTUs ( $t = -0.31$ ,  $P = 0.81$ ), Chao1 (with wet bottom group (WB) mean = 90.7,  
129 without wet bottom group (NWB) mean = 88.4,  $t = -0.20$ ,  $P = 0.83$ ), phylogenetic diversity  
130 (WB mean = 7.8, NWB mean = 8.1,  $t = -0.39$ ,  $P = 0.71$ ) and Shannon's diversity (WB mean  
131 = 2.4, NWB mean = 2.5,  $t = -0.15$ ,  $P = 0.86$ ) (see Table 3 for individual alpha diversity  
132 values). Results detailing abundance for all OTUs detected in koala urogenital samples are  
133 recorded in supplemental material Table S1.

134 Fewer than half of the OTUs detected across the two sample groups were shared between  
135 them (112/254) (Figure 2). At a read depth of 160,000 there was a significant difference  
136 between the microbial communities in koalas with wet bottom compared to those without,  
137 based on the results of a 10,000 permutation PERMANOVA using Bray-Curtis dissimilarity  
138 ( $F = 4.92$ ,  $P = 0.019$ ) and unweighted (qualitative) UniFrac distances ( $F = 1.62$ ,  $P = 0.031$ ).  
139 There was no significant difference detected when using weighted (quantitative) UniFrac  
140 distances ( $F = 1.51$ ,  $P = 0.061$ ). 2D and 3D principal coordinate analysis (PCoA) graphs  
141 comparing koalas with and without wet bottom are shown in Figure 3. These identify two  
142 outliers in the wet bottom present group, koalas 49 and 70.

143

144 **Comparisons between samples using DESeq2 normalised reads**

145 Negative binomial normalisation of reads from each sample using DESeq2 still resulted in  
146 Firmicutes as the most dominant phylum across all samples. This was followed by  
147 Proteobacteria and Bacteroidetes (Figure 4). Overall there were 25 OTUs with significant  
148 (Benjamini and Hochberg (9) adjusted  $P < 0.05$ ) over-representation or under-representation  
149 in wet bottom affected koalas, in comparison to clinically normal koalas, based on these  
150 normalised read counts (Table 4). Of those OTUs, when assessing absolute read count, six  
151 occurred only in koalas with wet bottom, whilst eight occurred only in koalas without wet  
152 bottom (Table 4). All normalised read values can be found in supplemental material Table  
153 S2, and all statistical comparisons in supplemental material Table S3.

## 154 **Discussion**

155 Previous assessment of the koala microbiome has focused on the digestive system of koalas  
156 comparing either two free ranging animals from northern populations (10) or two captive  
157 koalas in Europe (11), from which the ocular microbiome was also assessed. This study is the  
158 first investigation of the microbiome of the urogenital tract of the female koala using modern  
159 high-throughput techniques, and only the second to assess the urogenital tract of a marsupial,  
160 with the tammar wallaby (*Macropus eugenii*) investigated previously using terminal  
161 restriction fragment length polymorphism analysis (12). The majority of reads in our sample  
162 set were classified in the order *Lactobacillales* (72.1%). This dominance of Firmicutes  
163 mirrors what has been seen in the human vaginal microbiome (13). In humans, the acidic pH  
164 of the genital tract is maintained by these lactic acid producing bacteria, which in turn is  
165 thought to play a role in preventing pathogenic infection (14). It appears from our sample set  
166 that koalas have a different family within the *Lactobacillales*, possibly performing a similar  
167 role. The most common family within our classified OTUs, in terms of either relative or  
168 normalised read abundance, was *Aerococcaceae*, whilst in humans the *Lactobacilli* dominate

169 the reproductive tract. Within the *Aerococcaceae*, the genera *Aerococcus* and *Facklamia*  
170 were both represented in the top four most abundant OTUs. For all four significantly  
171 differentially abundant *Aerococcus* spp. OTUs, the same OTU could be detected in at least  
172 4/5 (80%) of the converse sample group in absolute reads. For example, OTU 4, an  
173 *Aerococcus* sp. occurred in all ten koala samples, but was present in significantly higher  
174 quantities in clinically normal koalas after normalisation ( $P = 0.004$ ). Whether specific  
175 *Aerococcus* spp. that are over or under-represented are an important factor in terms of disease  
176 presence requires further investigation. The production of hydrogen peroxide by commensal  
177 *Lactobacillus* species is thought to play a role in reducing the successful establishment of  
178 sexually transmitted diseases in humans (15, 16), and it has been shown that *Aerococcus* spp.  
179 are involved in hydrogen peroxide production (17, 18). In humans *Aerococcus* spp. have also  
180 been associated with disease, such as *Aerococcus urinae*, which can cause urinary tract  
181 infections (19) and septicaemia (20). Investigations into the urinary microbiome of women  
182 with and without ‘urgency urinary incontinence’ found that *Aerococcus* spp. were detected  
183 more frequently in cases where disease was present (21). In our study, the four *Aerococcus*  
184 spp. OTUs that had significantly different normalised abundance were evenly split, with two  
185 having higher abundance in koalas with wet bottom and two in koalas without wet bottom.  
186 The role of organisms within this family as opportunistic pathogens in koalas cannot be ruled  
187 out.

188 The *Aerococcus* were the most common genus amongst those OTUs with significant  
189 differential abundance after normalisation using DESeq2. The representative sequences of  
190 these four OTUs did not match known species within the *Aerococcus* genus, using the  
191 Greengenes database, with an identity greater than 90%, suggesting that these may represent  
192 novel species. This is not unexpected, as the culture of organisms from the koala urogenital  
193 tract has been limited to only a small number of studies, with the majority focused on



194 diagnosing what was later deemed to be chlamydial infection (22-24). Efforts in culturing  
195 novel bacteria from koalas have focused primarily on its gut microbiome (25), of interest due  
196 to the koala's unusual diet of *Eucalyptus* leaves, as well as the microbial flora in the pouch  
197 (26). Now that we have identified (to the genus level) some organisms of interest in the  
198 female koala urogenital microbiome, it would be beneficial to use traditional microbiology  
199 techniques to further study these organisms. The other family of interest are the  
200 *Tissierellaceae*, within the order *Clostridiales*. The four *Tissierellaceae* OTUs with a  
201 significant differential abundance, all occurred in higher normalised quantities in koalas with  
202 wet bottom present. Three of these OTUs were in the genus *Peptoniphilus*. Interestingly, only  
203 one of these four OTUs was detected at all in the group of koalas without wet bottom, and  
204 only from the reads of one koala within this group. The *Peptoniphilus*, previously part of the  
205 genus *Peptostreptococcus* (27) within the family *Peptostreptococcaceae* (also in the order  
206 *Clostridiales*), have been associated with inflammatory diseases in other species. This  
207 includes mastitis in cattle (28) and pelvic inflammatory disease in humans (29). Organisms in  
208 this genus are fastidious anaerobes (27) and therefore potentially overlooked in culture based  
209 methods of investigating urogenital tract pathogens.

210 The average number of OTUs detected in our samples is difficult to compare to other  
211 publications investigating koala microbiomes. This is both due to the impact that sample site  
212 differences would have on OTUs present, as well as the method of OTU classification used.  
213 For instance, previous research on the koala intestinal microbiome used QIIME for analysis  
214 of 454 pyrosequencing reads (10) and detected 1855 OTUs, after removal of chimeras and  
215 singletons, from caecum, colon, and faecal samples. Similarly, an Illumina based study of  
216 microbiomes from ocular, oral, rectal and faecal samples from two captive koalas found OTU  
217 numbers ranging between 597 to 3,592, with a median of 1,456 (11). The average raw read  
218 numbers per sample assessed in these projects ranged from 12,831 (454 pyrosequencing) to

219 323,030 (Illumina). Our own average raw reads per sample were within that range (229,561),  
220 suggesting that the OTU differences between our studies are either associated with the  
221 sample site (urogenital versus digestive tract) or clustering methodology used. We employed  
222 UPARSE due to its demonstrated ability to correctly identify OTUs in a mock community  
223 and minimise spurious OTUs (30). Whilst there did not appear to be any strong clustering on  
224 our 2D or 3D PCoA plots, comparisons of the beta-diversity between groups highlighted that  
225 the makeup of the communities was significantly different when assessing both Bray-Curtis  
226 dissimilarity and unweighted UniFrac distances. These metrics assess presence/absence of  
227 OTUs between groups, with UniFrac also considering phylogenetic distance between OTUs  
228 present. Weighted UniFrac distances, which considers the abundance of individual OTUs,  
229 were not significantly different between groups. Therefore, koalas with and without wet  
230 bottom appear to have a significant difference in which OTUs are present in the samples, but  
231 not necessarily the abundance of OTUs between samples. Two samples had widely different  
232 OTU profiles (koala 49 and 70). This finding may support the hypothesis that wet bottom in  
233 female koalas without *C. pecorum* may be caused by more than one aetiological agent (5, 31).  
234 Further investigations to examine this hypothesis are indicated but require access to a large  
235 number of appropriately collected and stored samples. Such sample sets are currently not  
236 available for this species.

237 It could be argued that the skewed relative abundance of Proteobacteria and Bacteroidetes in  
238 the samples from koala 49 and 70, respectively, could be a result of swab contamination with  
239 faecal material, which would impact diversity inferences. The human microbiome project  
240 identified that reads from stool samples were predominately from the Bacteroidetes phylum  
241 (32), and the most recent assessment of the koala rectal microbiome found these two phyla to  
242 be the most abundant in samples taken from both koalas assessed (11). In koalas, the  
243 urogenital tract is accessed through the cloaca, which also contains the rectal opening. This

244 makes faecal contamination difficult to avoid during sample collection. Future studies of the  
245 urogenital tract microbiome would benefit from either taking control samples from the  
246 rectum of the koala being sampled, or inverting the cloaca so that the urogenital opening is  
247 more easily accessible, as described previously for the tammar wallaby (12). In that study,  
248 approximately a quarter of phylotypes (26/96) were detected in both the urogenital and rectal  
249 samples, suggesting that bacteria being detected at multiple sites in marsupials is not unusual.

250

251 Our sample size is larger than previous studies of koala microbiomes, which have  
252 incorporated at most two individuals, yet it is substantially smaller than many studies in  
253 human medicine which include hundreds of samples (33). Our samples were  
254 opportunistically collected during population management exercises, and chosen from our  
255 sample archive due to the absence of *C. pecorum* from the French Island koala population at  
256 the time of testing (6). Whilst *C. pecorum* was subsequently determined to be present in this  
257 population (8), no koalas used in this project were positive via a *Chlamydiaceae* PCR.  
258 Importantly, no koalas used in this study were found to have reads classified within the  
259 *Chlamydiae* phylum after taxonomic assignment of OTUs.

260

261 Disturbance of the normal vaginal flora in humans, such as in cases of bacterial vaginosis, is  
262 a risk factor associated with infection by retroviruses (such as human immunodeficiency  
263 virus) and *Chlamydia trachomatis* (34). Our study provides useful data as to what bacteria  
264 could be expected in a clinically normal koala's urogenital tract. This will allow for broader,  
265 more detailed studies on the impact that infection with *C. pecorum* has on the koala  
266 urogenital microbiome, and vice versa. Future studies would benefit from a greater sample  
267 size and a more diverse array of sampled regions both within a single state, and across the

268 country. It would be interesting to follow the same individuals over time to determine if  
269 mating and breeding impact the microbiome of the urogenital tract, as occurs in humans (35).  
270 However, animal welfare issues regarding recapturing wild koalas multiple times may make  
271 this unfeasible. Additionally, as our study focused solely on female koalas, a follow up  
272 survey of the microbiome of the male urogenital tract would be enlightening. Finally,  
273 targeted studies assessing the prevalence of organisms associated with wet bottom would  
274 increase our understanding of organisms potentially impacting koala populations and could in  
275 turn assist with conservation of this iconic species.

## 276 **Methods**

### 277 **Sample Collection and initial screening**

278 Samples used in this study were urogenital swabs, from female koalas, stored in Buffer RLT  
279 (Qiagen) containing  $\beta$ -mercaptoethanol, taken from an archive of koala samples collected in  
280 2011 from French Island, Victoria, Australia (38°21'0" S, 145°22'12" E). Koala samples  
281 were collected under general anaesthetic by veterinarians and trained field assistants during  
282 routine population management exercises and clinical health of koalas was recorded at the  
283 time. Sample collection was approved by the University of Melbourne Faculty of Veterinary  
284 Science Animal Ethics Committee, application ID:1011687.1, and all sample collection was  
285 conducted following the Australian code for the care and use of animals for scientific  
286 purposes, 8th edition (36). Wet bottom score was assessed using a scoring system as  
287 previously described (37). These wet bottom scores grade the clinical findings relating to wet  
288 bottom from 0 (absent) to 10 (most severe). For the purpose of this study, koalas were  
289 grouped into wet bottom 'present' and wet bottom 'absent' categories. After screening all  
290 samples for *Chlamydiaceae* using a previously described qPCR (8, 38), we selected ten  
291 samples from female koalas where no *Chlamydiaceae* was detected. We used five samples

292 collected from koalas showing no clinical signs of urogenital disease and five samples  
293 collected from koalas that showed clinical signs of wet bottom (Table 1).

#### 294 **Amplification and sequencing**

295 DNA extraction and amplification from the swab samples was performed commercially by  
296 The Australian Genome Research Facility (Australia). Variable regions three and four of  
297 bacterial 16S rRNA were amplified using primers 341F (5' CCTAYGGGRBGCASCAG 3')  
298 and 806R (5' GGACTACNNGGGTATCTAAT 3'). Sequencing was performed on the  
299 Illumina MiSeq platform to produce paired end reads of 300 bp (2 × 300 bp).

#### 300 **Quality filtering and OTU assignment**

301 Quality filtering and operational taxonomic unit (OTU) assignment was undertaken using a  
302 mixture of scripts and algorithms available in the programs USEARCH 8.1 (39) and QIIME  
303 1.9.1 (Quantitative Insights Into Microbial Ecology) (40). Unless otherwise stated, default  
304 settings were used for all scripts. Read processing to reduce errors was undertaken as  
305 described by Edgar and Flyvbjerg (41). The forward and reverse 300 bp paired-end reads for  
306 each swab sample were merged using the USEARCH script **fastq\_mergepairs**. In this  
307 process, the Phred score of overlapping bases is recalculated to improve error calling. Bases  
308 with the same nucleotide called in both the forward and reverse reads have an increased  
309 recalculated score, and those with disagreements are reduced. This increases confidence in  
310 the calculated error probability of the merged reads. Primers were then trimmed from the 5'  
311 and 3' ends of the merged reads using seqtk (<https://github.com/lh3/seqtk>). Trimmed reads  
312 were filtered for quality using the USEARCH script **fastq\_filter**. This script filters reads  
313 using the maximum expected errors per merged read. The number of expected errors is  
314 obtained by the sum of the Phred derived error probability. If the expected number of errors  
315 is less than one, then the most probable number of errors is zero (41). We utilised a maximum

316 expected error threshold of 1, resulting in reads with an error probability of 1 or greater being  
317 removed. In addition to using the number of expected errors for filtering, trimmed reads  
318 shorter than 400 bp were discarded. Unique reads within the entire sample set were assigned  
319 OTUs using the USEARCH algorithms **derep\_fulllength** and **cluster\_otus** (30), with a  
320 minimum identity of 97% for clustering, or a cluster radius of 3.0. Chimeras are filtered from  
321 the sample set within the **cluster\_otus** command using the UPARSE-REF maximum  
322 parsimony algorithm (30). Singletons were excluded from OTU clustering due to the high  
323 likelihood that they contain errors (30, 41). The merged/trimmed reads from each swab  
324 sample, including the previously excluded singletons were matched with the clustered OTUs  
325 using USEARCH script **usearch\_global**, with a threshold of 97% identity to group a read  
326 into a specific OTU. The taxonomy of each OTU was determined by using the QIIME script  
327 **assign\_taxonomy.py** in conjunction with the Greengenes taxonomy database (version 13\_5,  
328 97% clustered OTUs) (42). This script utilises the UCLUST algorithm (39) to identify a  
329 consensus taxonomy of the reads within an OTU against the curated database, based on a  
330 similarity of 90% and a minimum consensus fraction of 0.51. Chloroplast and mitochondrial  
331 OTUs were removed from the dataset using the QIIME script  
332 **filter\_taxa\_from\_otu\_table.py**.

### 333 **Read normalisation and analysis**

334 Read data was assessed using three different methods. Relative abundance was utilised to  
335 compare basic phylum presence in each sample. Rarefaction of reads was undertaken, using  
336 **multiple\_rarefactions.py** QIIME script, to assess alpha and beta diversity at a set read level.  
337 Negative-binomial normalisation of reads, using DESeq2 (43) as recommended by  
338 McMurdie and Holmes (44), was performed using the QIIME script **normalize\_table.py**. For  
339 rarefactions, reads within each sample are subsampled (without replacement) every 5000  
340 reads, from 5000 to 250,000 reads. This represented the maximum number of reads present in

341 the sample with the most reads (rounded down to the nearest value divisible by 5,000). At  
342 each step, 100 permutations were undertaken. Alpha-diversity metrics (including species  
343 richness, Chao1 (45), phylogenetic diversity and Shannon's diversity (46)) were generated  
344 for each step. Comparisons of these values were undertaken using values obtained after  
345 subsampling to a depth of 160,000. This equalled the sample with the fewest reads (rounded  
346 down to the nearest value divisible by 5,000). Non-parametric comparisons of mean alpha  
347 diversity metrics between the two sample groups (wet bottom present or absent) were  
348 undertaken with the **compare\_alpha\_diversity.py** QIIME script. This script utilised a non-  
349 parametric two sample t-test with 10,000 Monte Carlo permutations to determine whether the  
350 alpha diversity was significantly different between the two groups (wet bottom  
351 present/absent) at a depth of 160,000 reads. Beta-diversity was assessed at the same depth as  
352 above (160,000 reads) using the **beta\_diversity\_through\_plots.py** QIIME script, in which  
353 both unweighted and weighted UniFrac distances (47) were assessed. Bray-Curtis  
354 dissimilarity (48) between samples was also assessed. The analysis of beta-diversity required  
355 a phylogenetic tree. For this, an alignment of representative sequences of each OTU was  
356 created with PyNAST (49) and UCLUST using the **align\_seqs.py** QIIME script. A tree was  
357 produced from this alignment using FastTree (50), and used as input for beta-diversity  
358 analysis. **beta\_diversity\_through\_plots.py** produced distance matrices for each of the tests  
359 (UniFrac and Bray-Curtis), from which principal coordinates and eigen values could be  
360 calculated. PCoA plots using the 2 or 3 most influential principal coordinates were drawn  
361 from the resulting distance matrices either using either the **make\_2d\_plots.py** QIIME script,  
362 or within the **beta\_diversity\_through\_plots.py** script using EMPeror 9.51 software (51),  
363 respectively. Distance and dissimilarity metrics were used to compare the microbial  
364 communities between the two groups by utilising the permutational ANOVA  
365 (PERMANOVA) method within the **compare\_categories.py** QIIME script, with 10,000

366 permutations. Statistical comparisons of the differential abundance of OTUs between koalas  
367 with and without wet bottom utilised DESeq2 within the QIIME script  
368 **differential\_abundance.py**. These comparisons aimed to determine OTUs which were over-  
369 represented in either group. Statistically significant results, using DESeq2s negative binomial  
370 Wald test, were based on  $P$ -values  $< 0.05$ , and were adjusted for false discovery within the  
371 script, using the method described by Benjamini and Hochberg (9).

372 The NCBI nucleotide database (52) was utilised to search for species level matches of  
373 significantly differentially abundant OTUs. This was conducted using the representative  
374 sequence of the significant OTU and the MegaBLAST algorithm (53), excluding uncultured  
375 sample sequences.

376 All reads used in the project are available through the NCBI BioProject ID: PRJNA359726.  
377 Accession numbers (SRX2464137 – SRX246146) for short reads are available in the short-  
378 read archive.

## 379 **Acknowledgements**

380 Alistair Legione is supported by an Australian Postgraduate Award. Funding for the research  
381 described was provided by the Holsworth Wildlife Research Endowment – Equity Trustees.  
382 The authors declare that there are no competing financial interests in relation to this research.

383

384 The authors would like to acknowledge the guidance and advice of Mr. Brendan Ansell, as  
385 well as those who assisted with the collection of samples from koalas in the field.



## 386 References

- 387 1. **Girjes AA, Hugall AF, Timms P, Lavin MF.** 1988. Two distinct forms of  
388 *Chlamydia psittaci* associated with disease and infertility in *Phascolarctos cinereus*  
389 (koala). *Infect Immun* **56**:1897-1900.
- 390 2. **Martin RW.** 1981. Age-specific fertility in three populations of the koala,  
391 *Phascolarctos cinereus* Goldfuss, in Victoria. *Wildl Res* **8**:275-283.
- 392 3. **Dickens RK.** 1976. The koala in health and disease. Refresher Course for  
393 Veterinarians Proceedings No 29:105-117.
- 394 4. **Brown AS, Girjes AA, Lavin MF, Timms P, Woolcock JB.** 1987. Chlamydial  
395 disease in koalas. *Aust Vet J* **64**:346-350.
- 396 5. **Patterson JLS, Lynch M, Anderson GA, Noormohammadi AH, Legione AR,  
397 Gilkerson JR, Devlin JM.** 2015. The prevalence and clinical significance of  
398 *Chlamydia* infection in island and mainland populations of Victorian koalas  
399 (*Phascolarctos cinereus*). *J Wildl Dis* **51**:309-317.
- 400 6. **Martin RW, Handasyde KA.** 1999. The koala: natural history, conservation and  
401 management, 2nd ed. UNSW Press Ltd, Sydney, NSW, Australia.
- 402 7. **Legione AR, Patterson JLS, Whiteley PL, Amery-Gale J, Lynch M, Haynes L,  
403 Gilkerson JR, Polkinghorne A, Devlin JM, Sansom FM.** 2016. Identification of  
404 unusual *Chlamydia pecorum* genotypes in Victorian koalas (*Phascolarctos cinereus*)  
405 and clinical variables associated with infection. *J Med Microbiol* **65**:420-428.
- 406 8. **Legione AR, Amery-Gale J, Lynch M, Haynes L, Gilkerson JR, Sansom FM,  
407 Devlin JM.** 2016. *Chlamydia pecorum* infection in free-ranging koalas  
408 (*Phascolarctos cinereus*) on French Island, Victoria, Australia. *J Wildl Dis* **52**:426-  
409 429.
- 410 9. **Benjamini Y, Hochberg Y.** 1995. Controlling the false discovery rate: A practical  
411 and powerful approach to multiple testing. *J Roy Stat Soc Ser B (Stat Method)*  
412 **57**:289-300.
- 413 10. **Barker CJ, Gillett A, Polkinghorne A, Timms P.** 2013. Investigation of the koala  
414 (*Phascolarctos cinereus*) hindgut microbiome via 16S pyrosequencing. *Vet Microbiol*  
415 **167**:554-564.
- 416 11. **Alfano N, Courtiol A, Vielgrader H, Timms P, Roca AL, Greenwood AD.** 2015.  
417 Variation in koala microbiomes within and between individuals: effect of body region  
418 and captivity status. *Sci Rep.* **5**:doi:10.1038/srep10189.
- 419 12. **Chhour K-L, Hinds LA, Deane EM, Jacques NA.** 2008. The microbiome of the  
420 cloacal openings of the urogenital and anal tracts of the tammar wallaby, *Macropus*  
421 *eugenii*. *Microbiology* **154**:1535-1543.
- 422 13. **Zhou X, Brown CJ, Abdo Z, Davis CC, Hansmann MA, Joyce P, Foster JA,  
423 Forney LJ.** 2007. Differences in the composition of vaginal microbial communities  
424 found in healthy caucasian and black women. *ISME J* **1**:121-133.
- 425 14. **Boskey ER, Telsch KM, Whaley KJ, Moench TR, Cone RA.** 1999. Acid  
426 production by vaginal flora in vitro is consistent with the rate and extent of vaginal  
427 acidification. *Infect Immun* **67**:5170-5175.
- 428 15. **Klebanoff SJ, Coombs RW.** 1991. Viricidal effect of *Lactobacillus acidophilus* on  
429 Human Immunodeficiency Virus Type 1: possible role in heterosexual transmission. *J*  
430 *Exp Med* **174**:289-292.
- 431 16. **Martin HL, Richardson BA, Nyange PM, Lavreys L, Hillier SL, Chohan B,  
432 Mandaliya K, Ndinya-Achola JO, Bwayo J, Kreiss J.** 1999. Vaginal Lactobacilli,  
433 microbial flora, and risk of Human Immunodeficiency Virus Type 1 and sexually  
434 transmitted disease acquisition. *J Infect Dis* **180**:1863-1868.

- 435 17. **Streitenberger SA, Lopez-Mas JA, Sanchez-Ferrer A, Garcia-Carmona F.** 2001.  
436 Highly efficient *Aerococcus viridans* L-alpha-glycerophosphate oxidase production in  
437 the presence of H<sub>2</sub>O<sub>2</sub>-decomposing agent: purification and kinetic characterization.  
438 Appl Microbiol Biotechnol **57**:329-333.
- 439 18. **Kontchou CY, Blondeau R.** 1990. Isolation and characterization of hydrogen  
440 peroxide producing *Aerococcus* sp. from soil samples. FEMS Microbiol Lett **68**:323-  
441 327.
- 442 19. **Zhang Q, Kwoh C, Attorri S, Clarridge JE.** 2000. *Aerococcus urinae* in urinary  
443 tract infections. J Clin Microbiol **38**:1703-1705.
- 444 20. **de Jong MFC, Soetekouw R, ten Kate RW, Veenendaal D.** 2010. *Aerococcus*  
445 *urinae*: severe and fatal bloodstream infections and endocarditis. J Clin Microbiol  
446 **48**:3445-3447.
- 447 21. **Pearce MM, Hilt EE, Rosenfeld AB, Zilliox MJ, Thomas-White K, Fok C,**  
448 **Kliethermes S, Schreckenberger PC, Brubaker L, Gai X, Wolfe AJ.** 2014. The  
449 female urinary microbiome: a comparison of women with and without urgency  
450 urinary incontinence. mBio. **5**:doi:10.1128/mBio.01283-14.
- 451 22. **Obendorf DL.** 1983. Causes of mortality and morbidity of wild koalas,  
452 *Phascolarctos cinereus* (Goldfuss), in Victoria, Australia. J Wildl Dis **19**:123-131.
- 453 23. **Brown AS, Grice RG.** 1984. Isolation of *Chlamydia psittaci* from koalas  
454 (*Phascolarctos cinereus*). Aust Vet J **61**:413.
- 455 24. **McKenzie RA.** 1981. Observations on diseases of free-living and captive koalas  
456 (*Phascolarctos cinereus*). Aust Vet J **57**:243-246.
- 457 25. **Osawa R, Blanshard W, Ocallaghan P.** 1993. Microbiological studies of the  
458 intestinal microflora of the koala, *Phascolarctos cinereus* II Pap, a special maternal  
459 feces consumed by juvenile koalas. Aust J Zool **41**:611-620.
- 460 26. **Osawa R, Blanshard WH, O'Callaghan PG.** 1992. Microflora of the pouch of the  
461 koala (*Phascolarctos cinereus*). J Wildl Dis **28**:276-280.
- 462 27. **Ezaki T, Kawamura Y, Li N, Li ZY, Zhao L, Shu S.** 2001. Proposal of the genera  
463 *Anaerococcus* gen. nov., *Peptoniphilus* gen. nov. and *Gallicola* gen. nov. for members  
464 of the genus *Peptostreptococcus*. Int J Syst Evol Microbiol **51**:1521-1528.
- 465 28. **Madsen M, Sørensen GH, Aalbaek B.** 1990. Summer mastitis in heifers: a  
466 bacteriological examination of secretions from clinical cases of summer mastitis in  
467 Denmark. Vet Microbiol **22**:319-328.
- 468 29. **Cunningham FG, Hauth JC, Gilstrap LC, Herbert WN, Kappus SS.** 1978. The  
469 bacterial pathogenesis of acute pelvic inflammatory disease. Obstet Gynecol **52**:161-  
470 164.
- 471 30. **Edgar RC.** 2013. UPARSE: highly accurate OTU sequences from microbial  
472 amplicon reads. Nat Meth **10**:996-998.
- 473 31. **Legione AR, Patterson JLS, Whiteley P, Firestone SM, Curnick M, Bodley K,**  
474 **Lynch M, Gilkerson JR, Sansom FM, Devlin JM.** 2017. Koala retrovirus  
475 genotyping analyses reveal a low prevalence of KoRV-A in Victorian koalas and an  
476 association with clinical disease. J Med Microbiol **66**:236-244.
- 477 32. **Human Microbiome Project Consortium.** 2012. Structure, function and diversity of  
478 the healthy human microbiome. Nature **486**:207-214.
- 479 33. **Ravel J, Gajer P, Abdo Z, Schneider GM, Koenig SSK, McCulle SL, Karlebach**  
480 **S, Gorle R, Russell J, Tacket CO, Brotman RM, Davis CC, Ault K, Peralta L,**  
481 **Forney LJ.** 2011. Vaginal microbiome of reproductive-age women. Proc Natl Acad  
482 Sci USA **108**:4680-4687.

- 483 34. **Wiesenfeld HC, Hillier SL, Krohn MA, Landers DV, Sweet RL.** 2003. Bacterial  
484 vaginosis is a strong predictor of *Neisseria gonorrhoeae* and *Chlamydia trachomatis*  
485 infection. *Clin Infect Dis* **36**:663-668.
- 486 35. **Aagaard K, Riehle K, Ma J, Segata N, Mistretta T-A, Coarfa C, Raza S,**  
487 **Rosenbaum S, Van den Veyver I, Milosavljevic A, Gevers D, Huttenhower C,**  
488 **Petrosino J, Versalovic J.** 2012. A metagenomic approach to characterization of the  
489 vaginal microbiome signature in pregnancy. *PLoS ONE*. **7**:e36466.  
490 doi:10.1371/journal.pone.0036466.
- 491 36. **National Health and Medical Research Council.** 2013. Australian code for the care  
492 and use of animals for scientific purposes, 8th ed. National Health and Medical  
493 Research Council, Canberra, Australia.
- 494 37. **Griffith JE.** 2010. Studies into the diagnosis, treatment and management of  
495 chlamydiosis in koalas. Doctorate of Philosophy. The University of Sydney, New  
496 South Wales, Australia.
- 497 38. **Robertson T, Bibby S, O'Rourke D, Belfiore T, Lambie H, Noormohammadi**  
498 **AH.** 2009. Characterization of *Chlamydiaceae* species using PCR and high resolution  
499 melt curve analysis of the 16S rRNA gene. *J Appl Microbiol* **107**:2017-2028.
- 500 39. **Edgar RC.** 2010. Search and clustering orders of magnitude faster than BLAST.  
501 *Bioinformatics* **26**:2460-2461.
- 502 40. **Caporaso JG, Kuczynski J, Stombaugh J, Bittinger K, Bushman FD, Costello**  
503 **EK, Fierer N, Pena AG, Goodrich JK, Gordon JI, Huttley GA, Kelley ST,**  
504 **Knights D, Koenig JE, Ley RE, Lozupone CA, McDonald D, Muegge BD,**  
505 **Pirrung M, Reeder J, Sevinsky JR, Turnbaugh PJ, Walters WA, Widmann J,**  
506 **Yatsunenko T, Zaneveld J, Knight R.** 2010. QIIME allows analysis of high-  
507 throughput community sequencing data. *Nat Methods* **7**:335-336.
- 508 41. **Edgar RC, Flyvbjerg H.** 2015. Error filtering, pair assembly and error correction for  
509 next-generation sequencing reads. *Bioinformatics* **31**:3476-3482.
- 510 42. **DeSantis TZ, Hugenholtz P, Larsen N, Rojas M, Brodie EL, Keller K, Huber T,**  
511 **Dalevi D, Hu P, Andersen GL.** 2006. Greengenes, a chimera-checked 16S rRNA  
512 gene database and workbench compatible with ARB. *Appl Environ Microbiol*  
513 **72**:5069-5072.
- 514 43. **Love MI, Huber W, Anders S.** 2014. Moderated estimation of fold change and  
515 dispersion for RNA-seq data with DESeq2. *Genome Biol.* **15**:550.  
516 doi:10.1186/s13059-014-0550-8.
- 517 44. **McMurdie PJ, Holmes S.** 2014. Waste not, want not: why rarefying microbiome  
518 data is inadmissible. *PLoS Comp Biol.* **10**:e1003531.  
519 doi:10.1371/journal.pcbi.1003531.
- 520 45. **Chao A.** 1984. Nonparametric estimation of the number of classes in a population.  
521 *Scand J Stat* **11**:265-270.
- 522 46. **Shannon CE.** 1948. A mathematical theory of communication. *Bell Syst Tech J*  
523 **27**:379-423.
- 524 47. **Lozupone C, Knight R.** 2005. UniFrac: a new phylogenetic method for comparing  
525 microbial communities. *Appl Environ Microbiol* **71**:8228-8235.
- 526 48. **Bray JR, Curtis JT.** 1957. An ordination of the upland forest communities of  
527 southern Wisconsin. *Ecol Monogr* **27**:325-349.
- 528 49. **Caporaso JG, Bittinger K, Bushman FD, DeSantis TZ, Andersen GL, Knight R.**  
529 2010. PyNASt: a flexible tool for aligning sequences to a template alignment.  
530 *Bioinformatics* **26**:266-267.

- 531 50. **Price MN, Dehal PS, Arkin AP.** 2009. FastTree: Computing Large Minimum  
532 Evolution Trees with Profiles instead of a Distance Matrix. *Mol Biol Evol* **26**:1641-  
533 1650.
- 534 51. **Vázquez-Baeza Y, Pirrung M, Gonzalez A, Knight R.** 2013. EMPERor: a tool for  
535 visualizing high-throughput microbial community data. *GigaScience*. **2**:16-16.  
536 doi:10.1186/2047-217X-2-16.
- 537 52. **Clark K, Karsch-Mizrachi I, Lipman DJ, Ostell J, Sayers EW.** 2016. GenBank.  
538 *Nucleic Acids Res* **44**:D67-D72.
- 539 53. **Morgulis A, Coulouris G, Raytselis Y, Madden TL, Agarwala R, Schaffer AA.**  
540 2008. Database indexing for production MegaBLAST searches. *Bioinformatics*  
541 **24**:1757-1764.

542

543

**Table 1.** Koala wet bottom score, read metrics and relative abundance data from ten samples submitted for 16S rRNA amplicon sequencing. All koalas were female and sampled from French Island, Victoria, Australia in 2011.

| Koala/Sample name                                     | K1         | K2         | K3         | K4       | K5         | K31        | K49        | K55        | K59        | K70         |
|-------------------------------------------------------|------------|------------|------------|----------|------------|------------|------------|------------|------------|-------------|
| <b>Wet bottom score*</b>                              | 0          | 0          | 0          | 0        | 0          | 2          | 3          | 3          | 4          | 3           |
| <b>Merged reads</b>                                   | 253256     | 211620     | 186912     | 220410   | 185592     | 183126     | 199985     | 263685     | 216495     | 300448      |
| <b>Reads after filtering</b>                          | 156100     | 134940     | 118418     | 132125   | 112823     | 110292     | 116321     | 160328     | 136996     | 169169      |
| <b>Reads clustered to OTUs</b>                        | 225868     | 178678     | 169576     | 203062   | 166906     | 162343     | 177452     | 216270     | 192105     | 254327      |
| <b>Absolute OTUs</b>                                  | 93         | 66         | 86         | 89       | 74         | 55         | 61         | 74         | 76         | 126         |
| <b>Standardised OTUs<sup>^</sup> ± SD<sup>+</sup></b> | 88.8 ± 1.7 | 64.1 ± 1.2 | 85.4 ± 0.7 | 88 ± 0.9 | 73.7 ± 0.6 | 54.9 ± 0.3 | 59.2 ± 1.4 | 69.2 ± 1.9 | 72.9 ± 1.5 | 123.4 ± 1.3 |
| <b>Phyla<sup>#</sup></b>                              |            |            |            |          |            |            |            |            |            |             |
| <i>Acidobacteria</i>                                  | -          | -          | -          | -        | < 0.01%    | -          | -          | -          | -          | 0.01%       |
| <i>Actinobacteria</i>                                 | 5.47%      | 9.06%      | 2.92%      | 0.17%    | 0.03%      | 3.27%      | 0.66%      | 1.50%      | 0.30%      | 0.19%       |
| <i>Armatimonadetes</i>                                | < 0.01%    | < 0.01%    | -          | -        | < 0.01%    | -          | -          | -          | -          | -           |
| <i>Bacteroidetes</i>                                  | 0.57%      | 0.05%      | 2.14%      | 1.72%    | 0.21%      | 0.33%      | 0.05%      | 9.05%      | 1.00%      | 50.53%      |
| <i>Cyanobacteria</i>                                  | < 0.01%    | -          | < 0.01%    | -        | -          | -          | -          | -          | -          | 0.02%       |
| <i>Deferribacteres</i>                                | -          | -          | -          | -        | -          | -          | -          | -          | -          | < 0.01%     |
| <i>Firmicutes</i>                                     | 92.92%     | 89.57%     | 85.67%     | 79.17%   | 98.92%     | 80.35%     | 40.92%     | 84.88%     | 95.65%     | 39.09%      |
| <i>Fusobacteria</i>                                   | 0.02%      | < 0.01%    | < 0.01%    | 0.07%    | < 0.01%    | < 0.01%    | -          | < 0.01%    | 0.02%      | 1.09%       |
| <i>Planctomycetes</i>                                 | -          | -          | < 0.01%    | -        | 0.01%      | -          | -          | -          | < 0.01%    | 0.80%       |
| <i>Proteobacteria</i>                                 | 0.24%      | 0.15%      | 1.66%      | 1.51%    | 0.45%      | 0.23%      | 56.90%     | 0.19%      | 2.37%      | 2.70%       |
| <i>Synergistetes</i>                                  | 0.08%      | 0.02%      | 0.30%      | 0.31%    | 0.01%      | -          | -          | < 0.01%    | 0.02%      | 4.35%       |
| <i>TM7</i>                                            | 0.02%      | 0.50%      | 0.21%      | -        | < 0.01%    | 1.38%      | 0.05%      | 2.86%      | < 0.01%    | 0.02%       |
| <i>Verrucomicrobia</i>                                | < 0.01%    | < 0.01%    | < 0.01%    | -        | 0.02%      | < 0.01%    | -          | -          | 0.01%      | 0.69%       |
| <b>Unassigned</b>                                     | 0.69%      | 0.65%      | 7.07%      | 17.04%   | 0.34%      | 14.44%     | 1.42%      | 1.52%      | 0.61%      | 0.52%       |

\* Wet bottom score ranges from 0 (absent) to 10 (most severe) (37)

<sup>^</sup> The average number of OTUs detected in 100 iterations of subsampling to a depth of 160,000 reads

<sup>+</sup> Standard deviation

<sup>#</sup> Phyla assigned using QIIME (40) script `assign_taxonomy.py` utilising Greengenes (42) curated 16S rRNA library

**Table 2.** Relative abundance of OTUs with taxonomic classification to a genus level, in koalas with and without wet bottom. Only OTUs with relative abundance greater than 0.01% in at least one group are shown.

| Phylum                 | Class                      | Order                     | Family                     | Genus                   | OTUs                         | WB <sup>^</sup> absent | WB present | Combined |        |
|------------------------|----------------------------|---------------------------|----------------------------|-------------------------|------------------------------|------------------------|------------|----------|--------|
| <i>Actinobacteria</i>  | <i>Actinobacteria</i>      | <i>Actinomycetales</i>    | <i>Actinomycetaceae</i>    | <i>Mobiluncus</i>       | 1                            | Nil <sup>#</sup>       | 0.05%      | 0.03%    |        |
|                        |                            |                           | <i>Corynebacteriaceae</i>  | <i>Corynebacterium</i>  | 6                            | 0.68%                  | 0.60%      | 0.64%    |        |
| <i>Bacteroidetes</i>   | <i>Bacteroidia</i>         | <i>Bacteroidales</i>      | <i>Bacteroidaceae</i>      | <i>Bacteroides</i>      | 14                           | 0.03%                  | 0.54%      | 0.29%    |        |
|                        |                            |                           | <i>Porphyromonadaceae</i>  | <i>Dysgonomonas</i>     | 1                            | <0.01%*                | 0.18%      | 0.09%    |        |
|                        |                            |                           |                            | <i>Parabacteroides</i>  | 7                            | 0.89%                  | 9.55%      | 5.22%    |        |
|                        |                            |                           |                            | <i>Porphyromonas</i>    | 2                            | <0.01%                 | 1.88%      | 0.94%    |        |
|                        |                            |                           |                            | <i>Prevotellaceae</i>   | <i>Prevotella</i>            | 2                      | <0.01%     | 0.02%    | 0.01%  |
| <i>Firmicutes</i>      | <i>Bacilli</i>             | <i>Bacillales</i>         | <i>Staphylococcaceae</i>   | <i>Staphylococcus</i>   | 1                            | 0.02%                  | <0.01%     | 0.01%    |        |
|                        |                            |                           | <i>Lactobacillales</i>     | <i>Aerococcaceae</i>    | <i>Aerococcus</i>            | 6                      | 77.45%     | 54.74%   | 66.10% |
|                        |                            |                           | <i>Aerococcaceae</i>       | <i>Facklamia</i>        | 1                            | 6.55%                  | 5.43%      | 5.99%    |        |
|                        |                            |                           | <i>Carnobacteriaceae</i>   | <i>Trichococcus</i>     | 1                            | 0.02%                  | 0.05%      | 0.04%    |        |
|                        |                            |                           | <i>Streptococcaceae</i>    | <i>Streptococcus</i>    | 2                            | 0.03%                  | <0.01%     | 0.02%    |        |
|                        |                            | <i>Clostridia</i>         | <i>Clostridiales</i>       | <i>Tissierellaceae</i>  | <i>Gallicola</i>             | 1                      | <0.01%     | 0.27%    | 0.14%  |
|                        |                            |                           |                            | <i>Peptoniphilus</i>    | 4                            | <0.01%                 | 0.53%      | 0.27%    |        |
|                        |                            |                           |                            | <i>ph2</i>              | 3                            | Nil                    | 0.10%      | 0.05%    |        |
|                        |                            |                           |                            | <i>Clostridiaceae</i>   | <i>Clostridium</i>           | 8                      | 4.48%      | 1.87%    | 3.18%  |
|                        |                            |                           |                            | <i>Peptococcaceae</i>   | <i>Peptococcus</i>           | 1                      | Nil        | 0.23%    | 0.11%  |
|                        |                            |                           |                            | <i>Ruminococcaceae</i>  | <i>Ruminococcus</i>          | 2                      | 0.07%      | 0.10%    | 0.08%  |
|                        |                            |                           |                            | <i>Veillonellaceae</i>  | <i>Dialister</i>             | 1                      | Nil        | 0.04%    | 0.02%  |
|                        |                            |                           |                            |                         | <i>Phascolarctobacterium</i> | 1                      | 0.04%      | 1.03%    | 0.54%  |
| <i>Fusobacteria</i>    | <i>Fusobacteriia</i>       | <i>Fusobacteriales</i>    | <i>Fusobacteriaceae</i>    | <i>Fusobacterium</i>    | 2                            | 0.02%                  | 0.22%      | 0.12%    |        |
| <i>Proteobacteria</i>  | <i>Alphaproteobacteria</i> | <i>Rhizobiales</i>        | <i>Methylobacteriaceae</i> | <i>Methylobacterium</i> | 2                            | 0.31%                  | 0.06%      | 0.19%    |        |
|                        | <i>Betaproteobacteria</i>  | <i>Burkholderiales</i>    | <i>Alcaligenaceae</i>      | <i>Sutterella</i>       | 1                            | <0.01%                 | 0.05%      | 0.02%    |        |
|                        | <i>Deltaproteobacteria</i> | <i>Desulfovibrionales</i> | <i>Desulfovibrionaceae</i> | <i>Desulfovibrio</i>    | 2                            | 0.06%                  | 0.12%      | 0.09%    |        |
|                        | <i>Gammaproteobacteria</i> | <i>Pasteurellales</i>     | <i>Pasteurellaceae</i>     | <i>Lonepinella</i>      | 1                            | 0.06%                  | 0.25%      | 0.15%    |        |
| <i>Pseudomonadales</i> |                            |                           | <i>Moraxellaceae</i>       | <i>Acinetobacter</i>    | 4                            | 0.01%                  | 0.02%      | 0.01%    |        |
|                        |                            | <i>Pseudomonadaceae</i>   | <i>Pseudomonas</i>         | 2                       | 0.01%                        | <0.01%                 | 0.01%      |          |        |
| <i>Synergistetes</i>   | <i>Synergistia</i>         | <i>Synergistales</i>      | <i>Synergistaceae</i>      | <i>vadinCA02</i>        | 1                            | Nil                    | 0.04%      | 0.02%    |        |

|                        |                         |                           |                            |                    |   |        |       |       |
|------------------------|-------------------------|---------------------------|----------------------------|--------------------|---|--------|-------|-------|
| <i>Verrucomicrobia</i> | <i>Verrucomicrobiae</i> | <i>Verrucomicrobiales</i> | <i>Verrucomicrobiaceae</i> | <i>Akkermansia</i> | 1 | <0.01% | 0.14% | 0.07% |
|------------------------|-------------------------|---------------------------|----------------------------|--------------------|---|--------|-------|-------|

<sup>^</sup> WB = Wet bottom

<sup>#</sup> No reads clustering with OTUs that were assigned this genus were present in any of the 5 koalas within this group

<sup>\*</sup> Less than 0.01% of reads were clustered to OTUs within this genus, but are included in this table due to the converse group having greater than 0.01% of reads clustered to OTUs within this genus.

**Table 3.** Alpha diversity metrics for microbial communities in the urogenital tract of koalas with and without wet bottom. All metrics assessed based on OTU values after subsampling to a depth of 160,000 reads, with 100 permutations. *P* values are non-parametric t-tests using 10,000 Monte Carlo permutations

|                    | Richness (OTUs) | Shannon's diversity | Chao1         | Phylogenetic diversity |
|--------------------|-----------------|---------------------|---------------|------------------------|
| Wet bottom absent  |                 |                     |               |                        |
| Koala 1            | 88.8 (± 1.7) *  | 2.6 (± <0.01)       | 97.1 (± 5.9)  | 9.1 (± 0.2)            |
| Koala 2            | 64.1 (± 1.2)    | 2.7 (± <0.01)       | 84.9 (± 7.4)  | 7.0 (± 0.1)            |
| Koala 3            | 85.4 (± 0.7)    | 3.0 (± <0.01)       | 91.5 (± 2.7)  | 8.9 (± 0.1)            |
| Koala 4            | 88 (± 0.9)      | 3.1 (± <0.01)       | 92.5 (± 3.7)  | 7.7 (± 0.1)            |
| Koala 5            | 73.7 (± 0.6)    | 1.1 (± <0.01)       | 87.6 (± 4.9)  | 7.9 (± 0.1)            |
| <b>Mean</b>        | 80.0 (± 9.6)    | 2.5 (± 0.7)         | 90.7 (± 4.2)  | 8.1 (± 0.8)            |
| Wet bottom present |                 |                     |               |                        |
| Koala 31           | 54.9 (± 0.3)    | 2.4 (± <0.01)       | 58.7 (± 0.8)  | 6.5 (± 0.0)            |
| Koala 49           | 59.2 (± 1.4)    | 1.4 (± <0.01)       | 76.4 (± 7.2)  | 6.5 (± 0.2)            |
| Koala 55           | 69.2 (± 1.9)    | 2.3 (± <0.01)       | 91.5 (± 13.5) | 7.8 (± 0.2)            |
| Koala 59           | 72.9 (± 1.5)    | 1.8 (± <0.01)       | 87.4 (± 7.1)  | 7.8 (± 0.1)            |
| Koala 70           | 123.4 (± 1.3)   | 4.1 (± <0.01)       | 127.9 (± 5.9) | 10.4 (± 0.1)           |
| <b>Mean</b>        | 75.9 (± 24.6)   | 2.4 (± 0.9)         | 88.4 (± 22.8) | 7.8 (± 1.4)            |
| <i>t</i> stat      | -0.31           | -0.15               | -0.20         | -0.39                  |
| <i>P</i> value     | 0.81            | 0.86                | 0.83          | 0.71                   |

\* All ± values are standard deviation from the mean



**Table 4.** Significant operational taxonomic units (OTU) assessed using DESeq2 (43), ordered from lowest to highest adjusted *P* value. Representative sequences were compared to NCBI nucleotide database using MegaBLAST (53), excluding ‘uncultured organisms’

| OTU ID | Adjusted <i>P</i> value <sup>#</sup> | Higher abundance group <sup>*</sup> | OTU present in samples/n |            | NCBI Mega BLAST <sup>^</sup>          | Nucleotide Identity (%) <sup>^</sup> | Accession number <sup>^</sup> |
|--------|--------------------------------------|-------------------------------------|--------------------------|------------|---------------------------------------|--------------------------------------|-------------------------------|
|        |                                      |                                     | WB absent                | WB present |                                       |                                      |                               |
| 38     | < 0.001                              | WB present                          | 0/5                      | 5/5        | <i>Peptoniphilus indolicus</i>        | 96.8                                 | NR_117566                     |
| 21     | < 0.001                              | WB present                          | 1/5                      | 5/5        | <i>Peptoniphilus asaccharolyticus</i> | 100                                  | KP944181                      |
| 47     | < 0.001                              | WB present                          | 0/5                      | 3/5        | <i>Levyella massiliensis</i>          | 100                                  | NR_133039                     |
| 51     | < 0.001                              | WB present                          | 0/5                      | 3/5        | <i>Peptoniphilus lacrimalis</i>       | 100                                  | KM624632                      |
| 65     | 0.001                                | WB present                          | 1/5                      | 2/5        | <i>Sutterellaceae bacterium</i>       | 99.5                                 | LK054638                      |
| 86     | 0.003                                | WB absent                           | 3/5                      | 0/5        | <i>Bacteroides thetaiotaomicron</i>   | 100                                  | KU234409                      |
| 75     | 0.004                                | WB absent                           | 2/5                      | 0/5        | <i>Clostridium</i> sp.                | 96.5                                 | AB622820                      |
| 4      | 0.004                                | WB absent                           | 5/5                      | 5/5        | <i>Lactobacillales</i> bacterium      | 92.8                                 | HQ115584                      |
| 70     | 0.005                                | WB absent                           | 2/5                      | 0/5        | <i>Clostridium neopropionicum</i>     | 94.6                                 | JQ897394                      |
| 73     | 0.005                                | WB present                          | 0/5                      | 2/5        | <i>Alistipes onderdonkii</i>          | 93.6                                 | NR_113151                     |
| 69     | 0.005                                | WB absent                           | 2/5                      | 0/5        | <i>Lachnospiraceae</i> bacterium      | 95.3                                 | EU728729                      |
| 2      | 0.006                                | WB absent                           | 5/5                      | 5/5        | <i>Trichococcus</i> sp.               | 94.2                                 | KU533824                      |
| 94     | 0.007                                | WB absent                           | 2/5                      | 1/5        | <i>Rhizobiales</i> sp.                | 100                                  | KJ016001                      |
| 95     | 0.013                                | WB absent                           | 2/5                      | 0/5        | <i>Rhizobium leguminosarum</i>        | 100                                  | KX346599                      |
| 103    | 0.019                                | WB absent                           | 2/5                      | 0/5        | <i>Piscinibacter aquaticus</i>        | 88.6                                 | NR_114061                     |
| 106    | 0.019                                | WB absent                           | 3/5                      | 0/5        | <i>Burkholderia cenocepacia</i>       | 100                                  | KU749979                      |
| 109    | 0.019                                | WB present                          | 0/5                      | 2/5        | <i>Peptostreptococcus anaerobius</i>  | 94.1                                 | NR_042847                     |
| 148    | 0.019                                | WB present                          | 0/5                      | 2/5        | <i>Trichococcus</i> sp.               | 87.5                                 | KU533824                      |
| 159    | 0.019                                | WB present                          | 2/5                      | 4/5        | <i>Abiotrophia defectiva</i>          | 87.9                                 | JF803600                      |
| 114    | 0.019                                | WB absent                           | 2/5                      | 1/5        | <i>Massilia</i> sp.                   | 99.8                                 | JF279920                      |
| 113    | 0.019                                | WB absent                           | 3/5                      | 0/5        | <i>Agrobacterium tumefaciens</i>      | 100                                  | KU955329                      |
| 1      | 0.030                                | WB present                          | 5/5                      | 5/5        | <i>Aerococcus viridans</i>            | 95.1                                 | KC699123                      |
| 105    | 0.035                                | WB present                          | 4/5                      | 5/5        | <i>Aerococcus sanguinicola</i>        | 93.0                                 | LC145565                      |

|     |       |            |     |     |                               |      |           |
|-----|-------|------------|-----|-----|-------------------------------|------|-----------|
| 250 | 0.038 | WB present | 1/5 | 2/5 | <i>Hippea</i> sp.             | 79.5 | FR754504  |
| 90  | 0.038 | WB present | 1/5 | 2/5 | <i>Olsenella scatoligenes</i> | 97.8 | NR_134781 |

# *P* value are from negative binomial Wald test, adjusted using the false discovery rate calculation described by Benjamini and Hochberg (9)

\* OTU was detected with significantly higher normalised read counts in koalas with (WB present) or without (WB absent) wet bottom

^ Organism with the lowest e-value detected using a MegaBLAST search of the NCBI nucleotide database, the nucleotide identity compared to the representative sequence, and the accession number of the hit

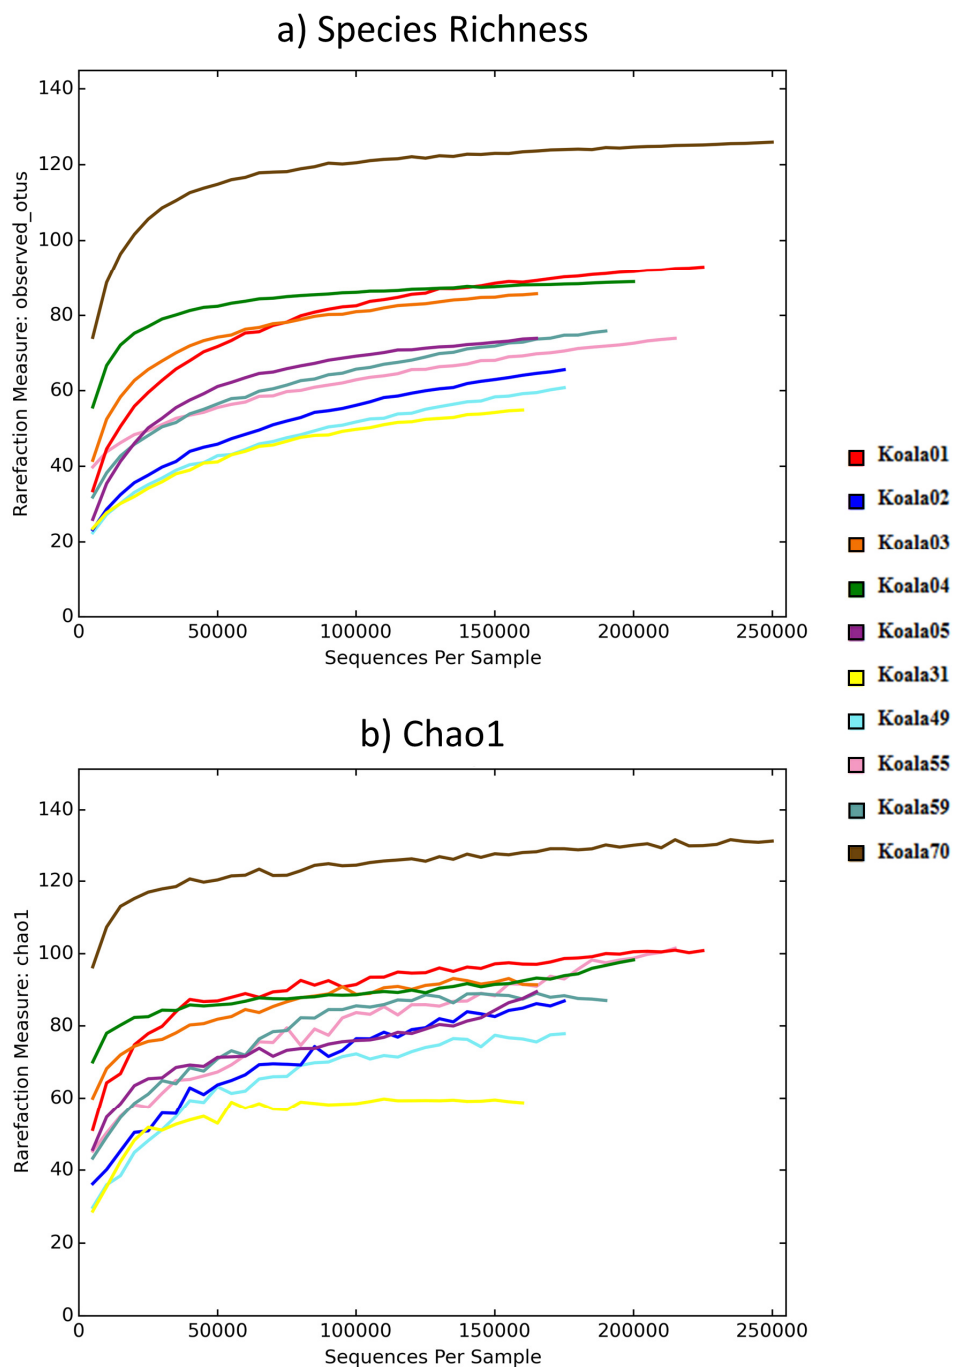

**Figure 1.** Rarefaction plots showing a) species richness (OTU abundance) and b) Chao1. OTUs were subsampled every 5000 reads, with 100 iterations, with the mean result of these iterations forming the plots. Koalas 1 – 5 were clinically normal (wet bottom absent), whilst koalas 31 – 70 had wet bottom.

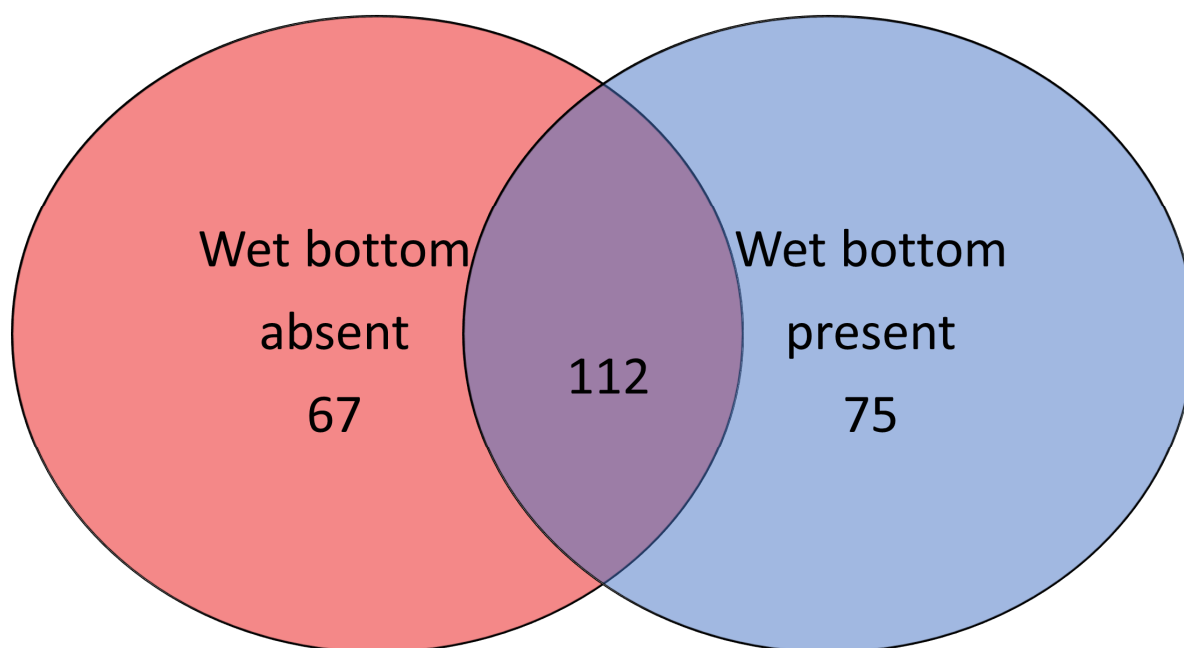

**Figure 2.** Venn diagram of the total operational taxonomic units (OTUs) detected in koalas with or without wet bottom. Overlap does not scale with OTU number.

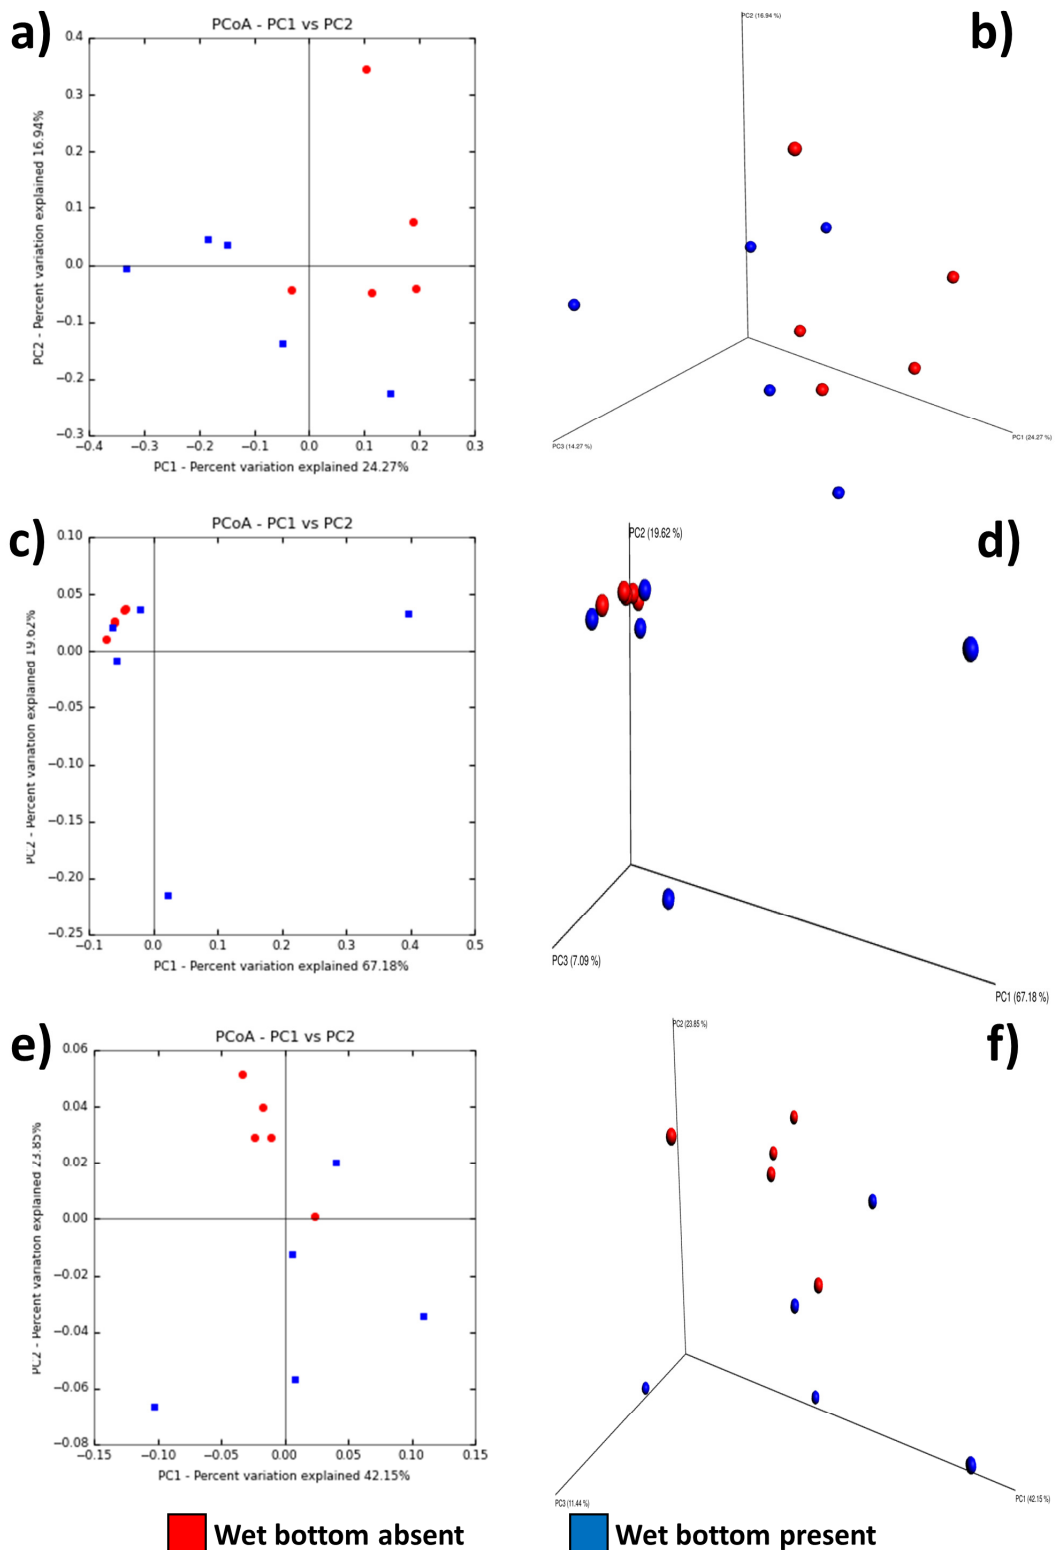

**Figure 3.** 2D and 3D PCoA plots of koala samples, with and without wet bottom, using **a/b)** unweighted UniFrac distances of OTUs at a depth of 160,000 reads, **c/d)** weighted UniFrac distances of OTUs at a depth of 160,000, **e/f)** weighted UniFrac distances of normalised reads

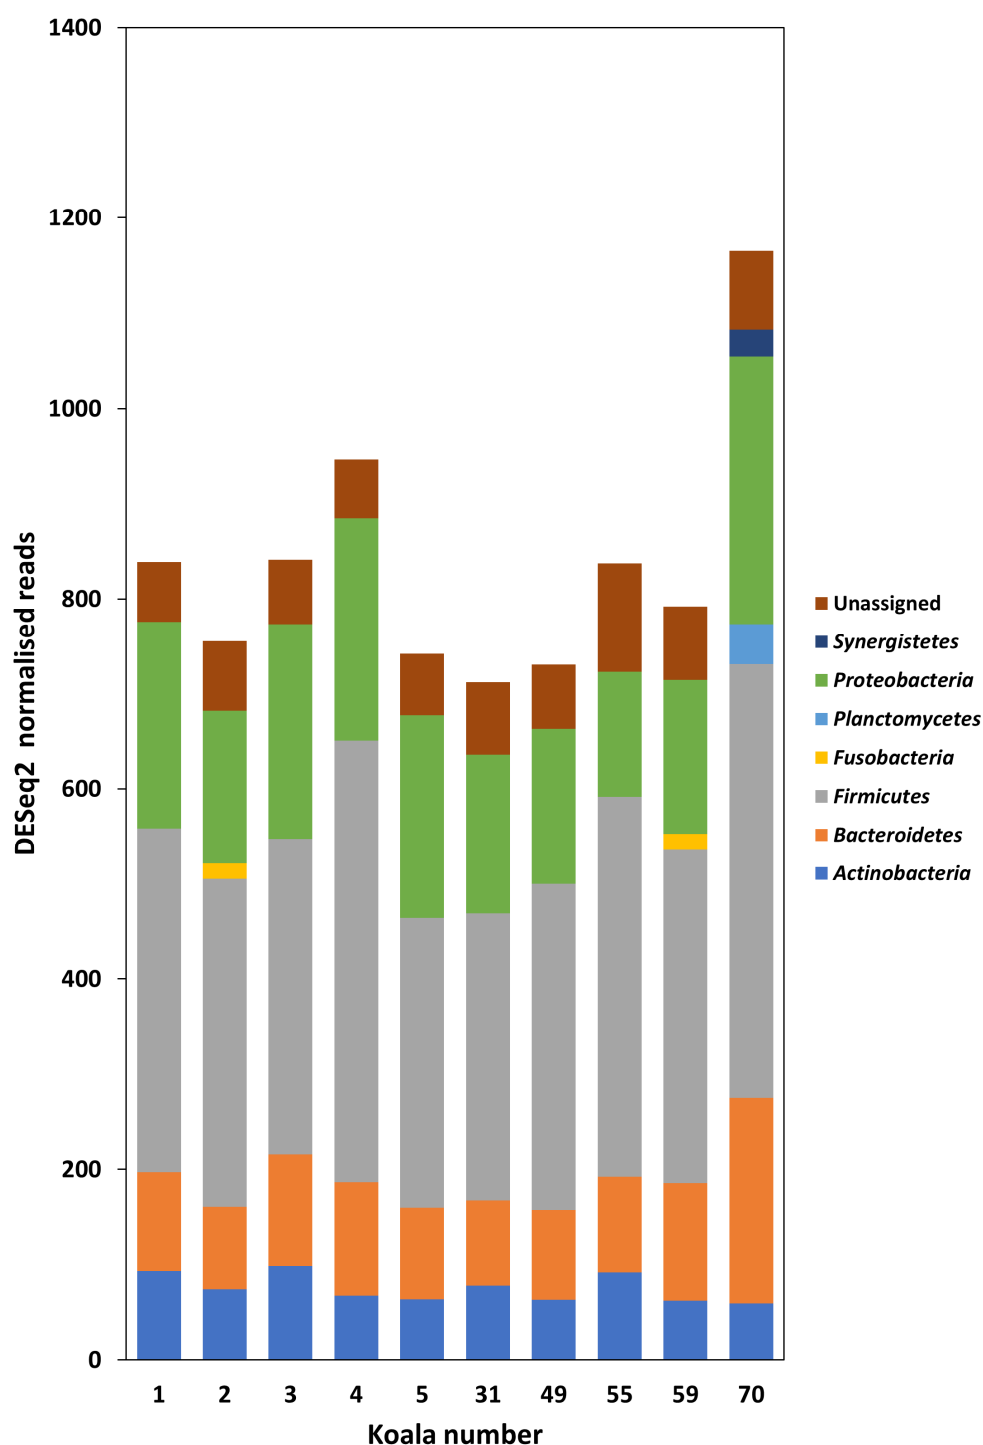

**Figure 4.** DESeq2 normalised read counts of phyla detected in koala urogenital swab samples. Phyla with fewer than 2% relative reads within each sample have been excluded for clarity. Reads were characterised into taxonomic groups using QIIME (40), utilising Greengenes (42) as a reference database. Koalas 1 – 5 were clinically normal (wet bottom absent), whilst koalas 31 – 70 had wet bottom
